# Supplementary material for: A Nonlinear Dynamic Approach Reveals a Long-Term Stroke Effect on Cerebral Blood Flow Regulation at Multiple Time Scales
Source: PubMed Central journal article supplement (PMC3395609; doi:10.1371/journal.pcbi.1002601), 2012-07-12

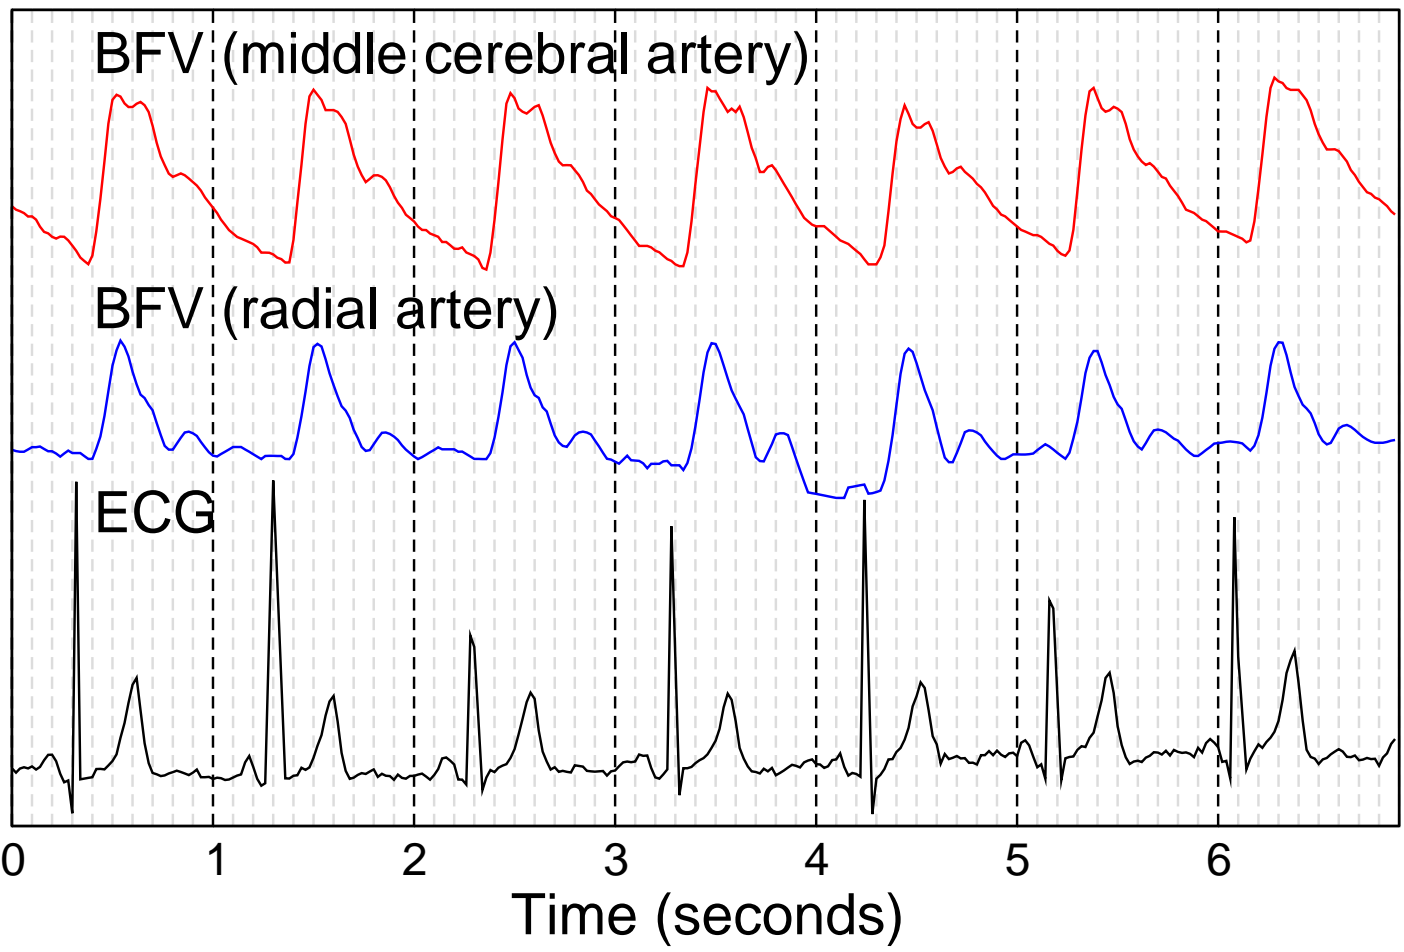

Supplement: pcbi.1002601.s003.pdf [file pcbi.1002601.s003.pdf]
