# Supplementary material for: A Nonlinear Dynamic Approach Reveals a Long-Term Stroke Effect on Cerebral Blood Flow Regulation at Multiple Time Scales
Source: PubMed Central journal article supplement (PMC3395609; doi:10.1371/journal.pcbi.1002601), 2012-07-12
Supplement: pcbi.1002601.s005.pdf [file pcbi.1002601.s005.pdf]

### **Variations in BFV-BP phase shift due to nonstationary oscillations**

BP (and BFV) oscillations are often nonstationary as characterized by different frequency and amplitude for different cycles even within one oscillatory mode. Figure S1 shows a BP recording with well pronounced oscillations at a mean frequency of  $\sim 0.13$  Hz (i.e. 39 cycles in  $\sim 300$  seconds). Further examination of individual cycles indicated that cycle length or frequency was time-variant, changing cycle by cycle with the lowest frequency = 0.09 Hz and the highest frequency = 0.21 Hz (Figure S1 C). Over this frequency range, BFV-BP phase shift could be very different. For instance, the mean phase shift decreased from  $\sim 52^\circ$  at 0.09 Hz to  $\sim 20^\circ$  at 0.21 Hz in the non-stroke group, and decreased from  $\sim 47^\circ$  at 0.09 Hz to  $\sim 7^\circ$  at 0.21 Hz in the stroke group (Figure 3). Considering the dramatic difference over such a narrow frequency range, it is important to study individual BFV and BP cycles in order to ensure reliable assessment of the multiscale BFV-BP phase relationship.
