# Supplementary material for: A Nonlinear Dynamic Approach Reveals a Long-Term Stroke Effect on Cerebral Blood Flow Regulation at Multiple Time Scales
Source: PLOS journal article supplement (doi:10.1371/journal.pcbi.1002601), 2012-07-12
Supplement: S8 (10.1371/journal.pcbi.1002601.s008) [file journal.pcbi.1002601.s008]

301 Moved Permanently

# Moved Permanently

The document has moved here.

---

Apache Server at www.ploscompbiol.org Port 80
